# Supplementary material for: Magnetism tuned by the charge states of defects in bulk C-doped SnO2materials
Source: Royal Society of Chemistry journal article supplement (doi:10.1039/c5cp02577j), 2015-01-01
Supplement: c5cp02577j1.pdf [file c5cp02577j1.pdf]

## Supplementary materials

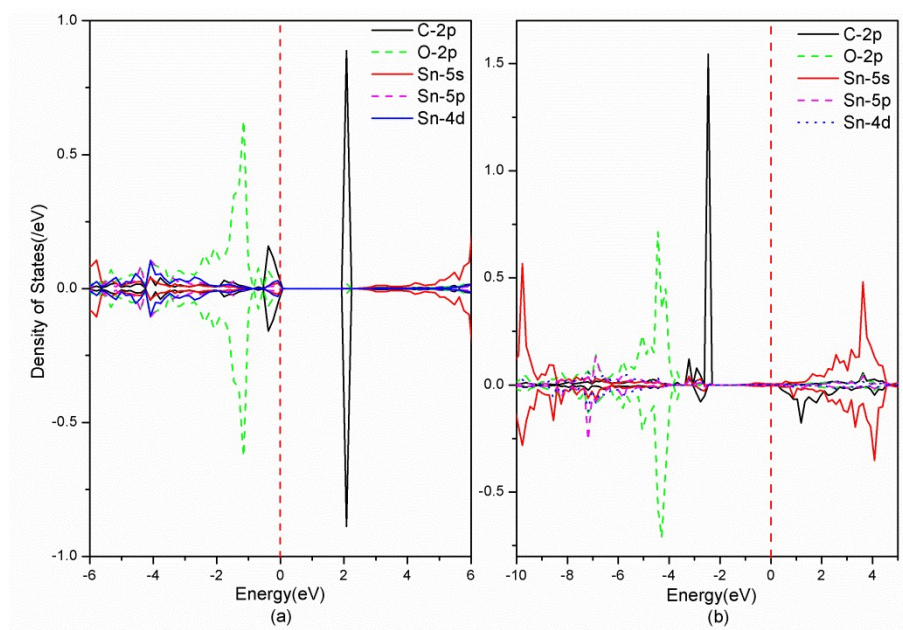

Figure S1. HSE06 function calculated PDOS of  $C_O$  defects in (a) neutral and (b) -2 charge state, respectively. The vertical red dashed line represents Fermi level.

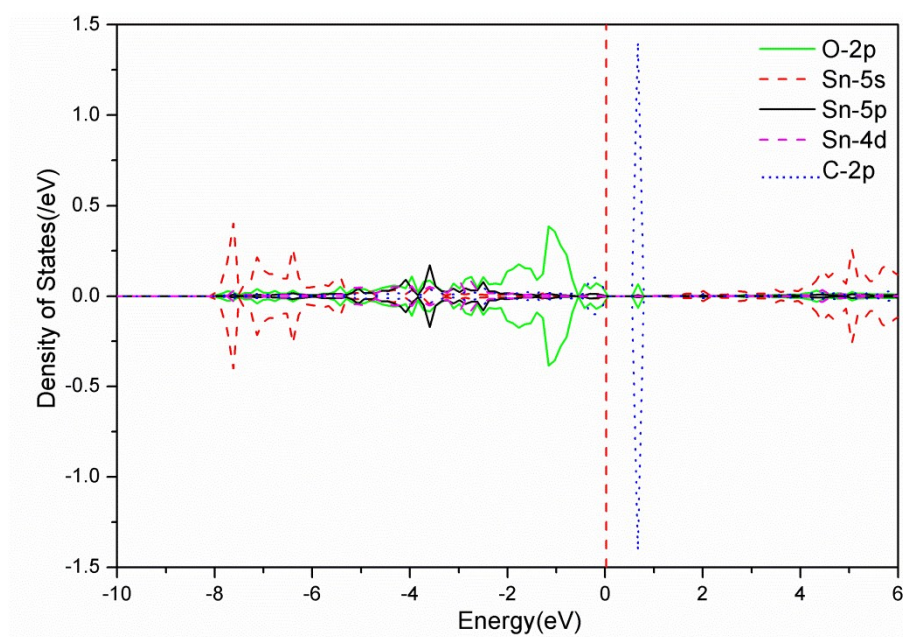

Figure S2. PDOS of bulk SnO<sub>2</sub>:C materials calculated by GGA function. The vertical red dashed line represents Fermi level.
